# Supplementary material for: Feasibility of Deep Learning-Based Analysis of Auscultation for Screening Significant Stenosis of Native Arteriovenous Fistula for Hemodialysis Requiring Angioplasty
Source: PubMed Central journal article supplement — Korean J Radiol. 2022 Sep 13;23(10):949–58. doi: 10.3348/kjr.2022.0364 (PMC9523235; doi:10.3348/kjr.2022.0364), 2022-09-13
Supplement: kjr-23-949-s001.pdf [file kjr-23-949-s001.pdf]

## SUPPLEMENT

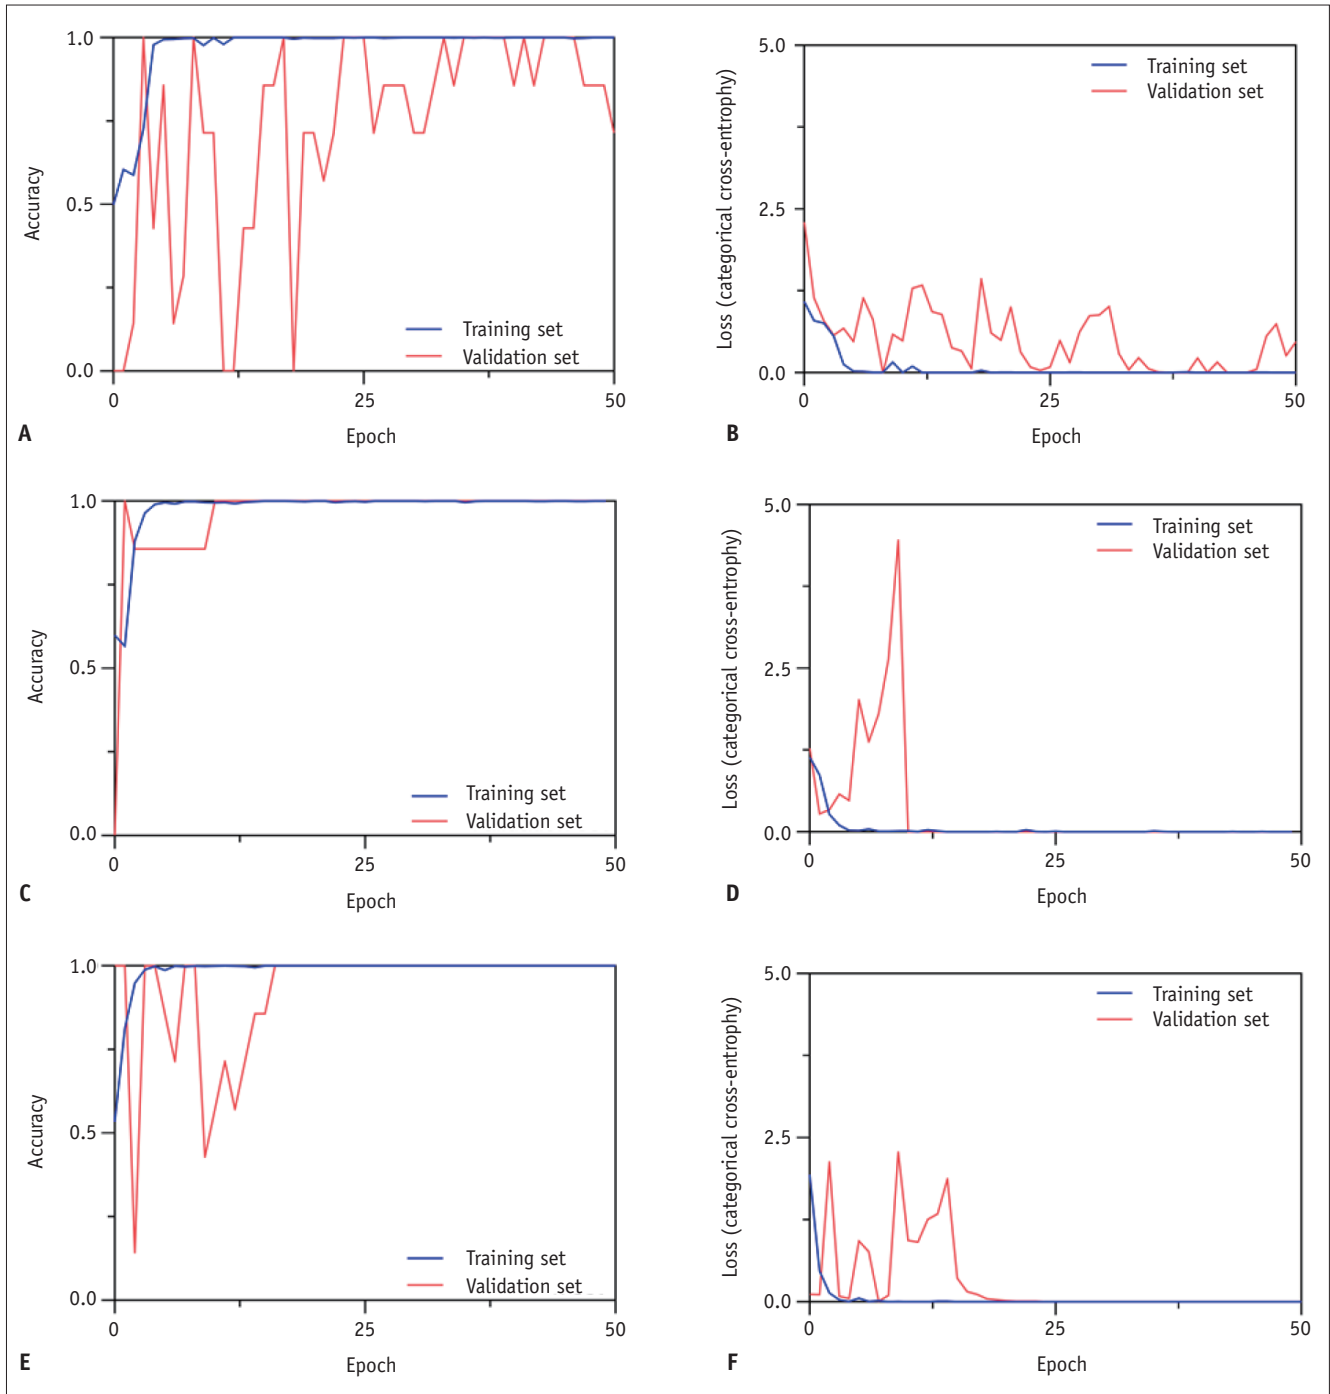

**Supplementary Fig. 1. Accuracy (A, C, E) and loss (categorical cross-entropy) (B, D, F) of the training and validation sets of the DenseNet201 (A, B), EfficientNetB5 (C, D), and ResNet50 (E, F) models for predicting hemodynamically significant arteriovenous fistula stenosis.**

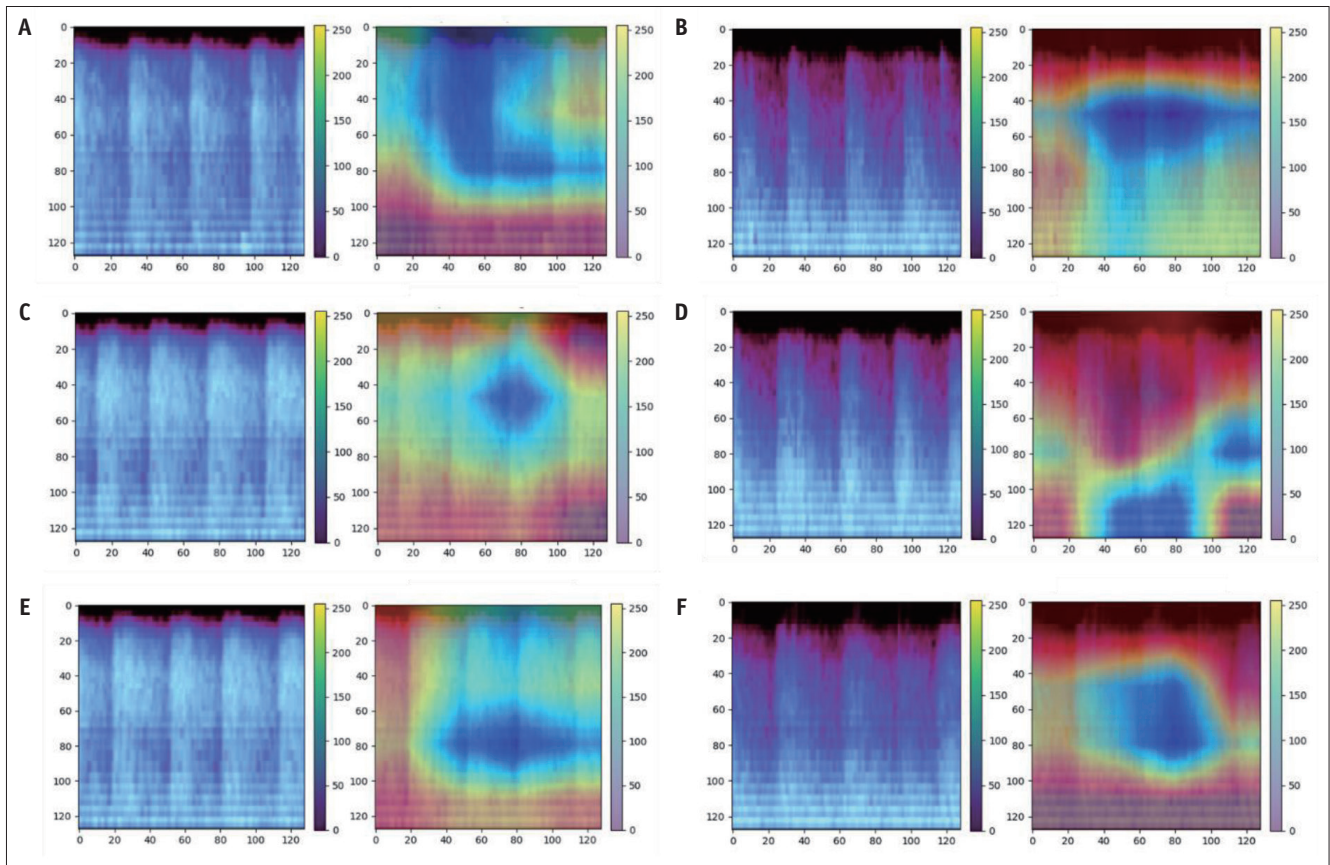

**Supplementary Fig. 2. Examples of mel spectrograms and gradient-weighted class activation mapping (Grad-CAM) heat-maps of pre-PTA (A, C, E) and post-PTA shunt sounds (B, D, F) of the DenseNet201 (A, B), EfficientNetB5 (C, D), and ResNet50 (E, F) models. PTA = percutaneous transluminal angioplasty**
